# Supplementary material for: Imidazolopiperazine (IPZ)-Induced Differential Transcriptomic Responses on Plasmodium falciparum Wild-Type and IPZ-Resistant Mutant Parasites
Source: MDPI journal article supplement (doi:10.3390/genes14122124), 2023-11-24
Supplement: s1 [file s1]

## Supplementary Figures

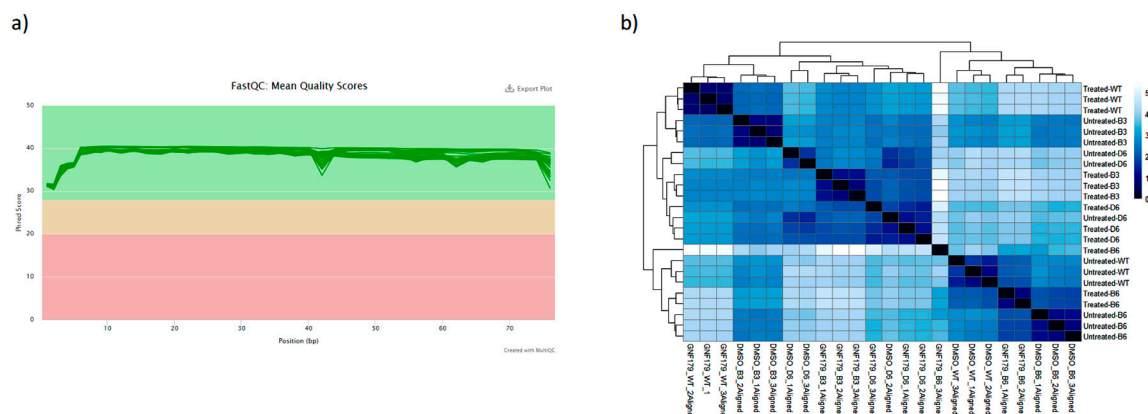

**Figure S1. Quality Control and Pre-processing of the raw reads.** Quality control of reads by the Fastqc tool which details the quality score for 48 reads. Green = good quality of the reads, dark Yellow = medium quality of the reads and red = bad quality of the reads. **b)** heatmap plot to indicate similarity between biologic replicate based on Euclidean Distance.

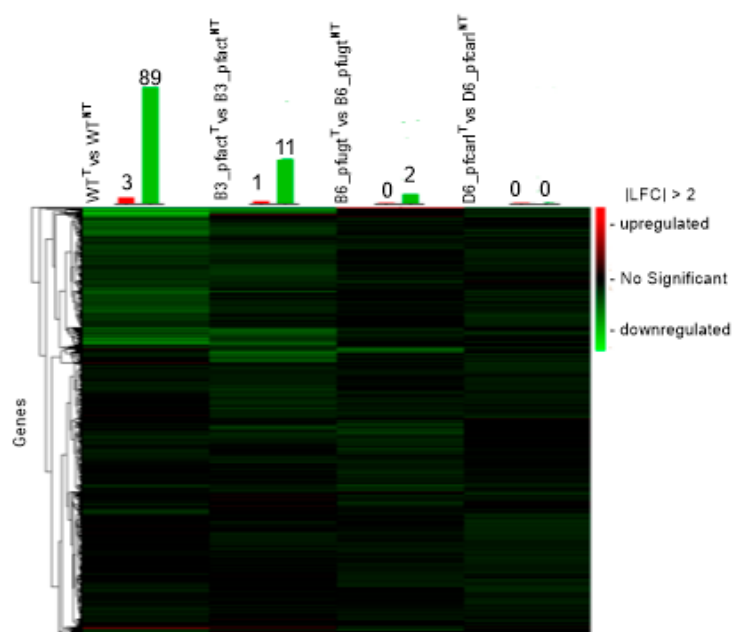

**Figure S2. Transcriptomic profile of the drug impact in wild type and mutant (B3\_Pfact), (B6\_Pfugt), (D6\_Pfcarl) parasites resistant to IPZ in GNF179 (100 nM) treated as compared to untreated conditions.** Heatmap plot showing upregulate (red) and downregulate (green) genes in each parasite in GNF179 (100 nM) treated as compared to not treated.

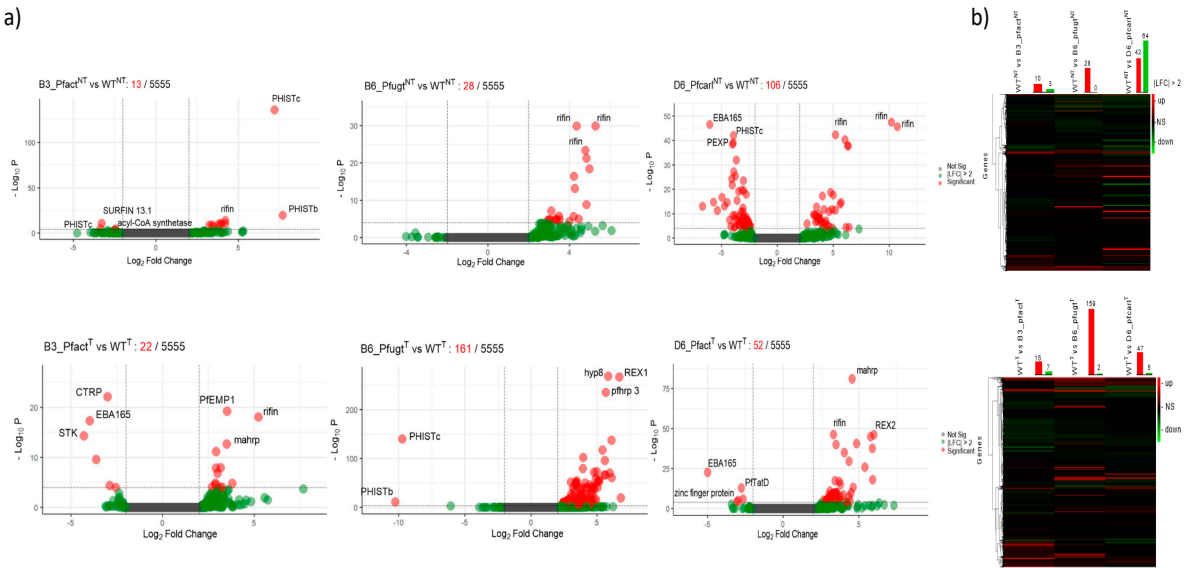

**Figure S3. Transcriptomic profile of the mutation impacts in (B3\_Pfact), (B6\_Pfugt), (D6\_Pfcarl) parasites resistant to IPZ compared to wild type. a)** volcano plot displaying mutation impact on the transcriptomic profile between each mutant parasite compared to WT in treated and untreated conditions. **b)** heatmap plot showing number of upregulate (red) and downregulate (green) genes in each mutant (B6\_Pfugt), (D6\_Pfcarl) parasites resistant to IPZ compared to wild type in GNF179 (100 nM) treated and not treated conditions

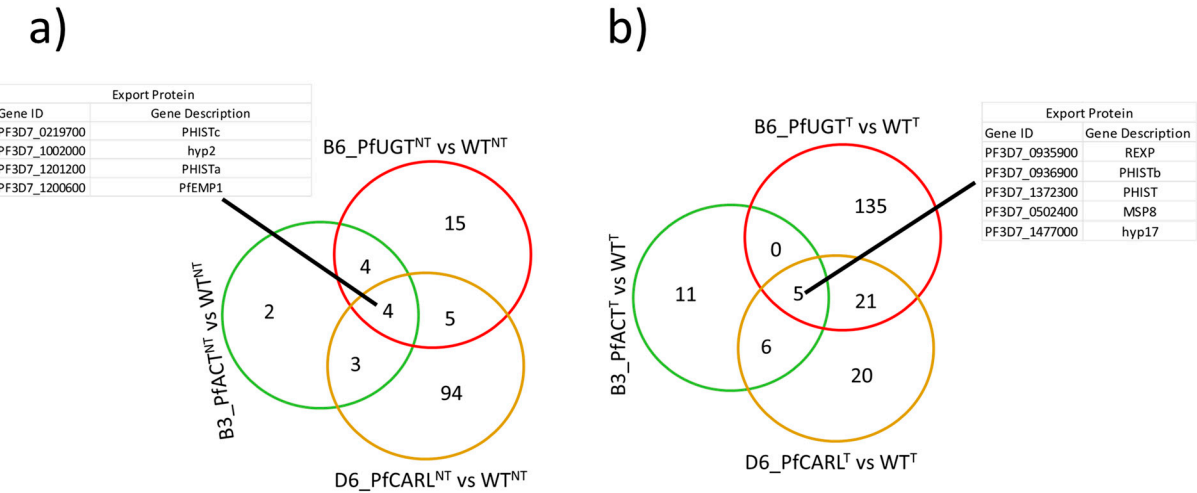

**Figure S4. Export protein affected on common mutant parasites in treated and untreated conditions. Veen diagram showing mutation impact on parasites commonly affected gene associated with protein trafficking in:**

a) untreated and b) GNF179 (100 nM) treated conditions.

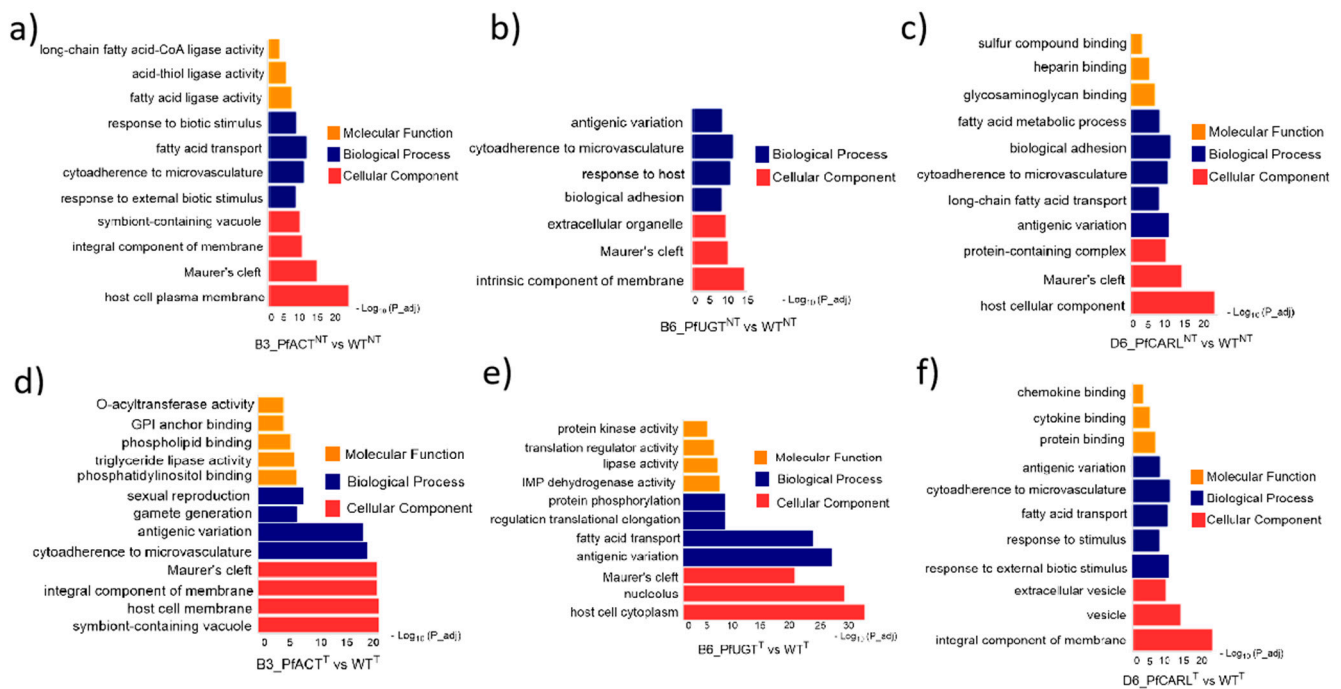

**Figure S5. Cellular components, biological process and molecular function disturbed by GNF179 between Wild type and IPZ resistant parasite in GNF179 (100 nM) treated and untreated condition. a)** Wild type (WT<sup>NT</sup>) parasites versus mutant (B3\_PfACT<sup>NT</sup>); **b)** Wild type (WT<sup>NT</sup>) parasites versus mutant (B6\_PfUGT<sup>NT</sup>), **c)** Wild type (WT<sup>NT</sup>) parasites versus mutant (D6\_PfCARL<sup>NT</sup>) parasites resistant to IPZ; **d)** Wild type (WT<sup>T</sup>) parasites versus mutant (B3\_PfACT<sup>T</sup>); **e)** Wild type (WT<sup>T</sup>) parasites versus mutant (B6\_PfUGT<sup>T</sup>), **f)** Wild type (WT<sup>T</sup>) parasites versus mutant (D6\_PfCARL<sup>T</sup>) parasites resistant to IPZ.

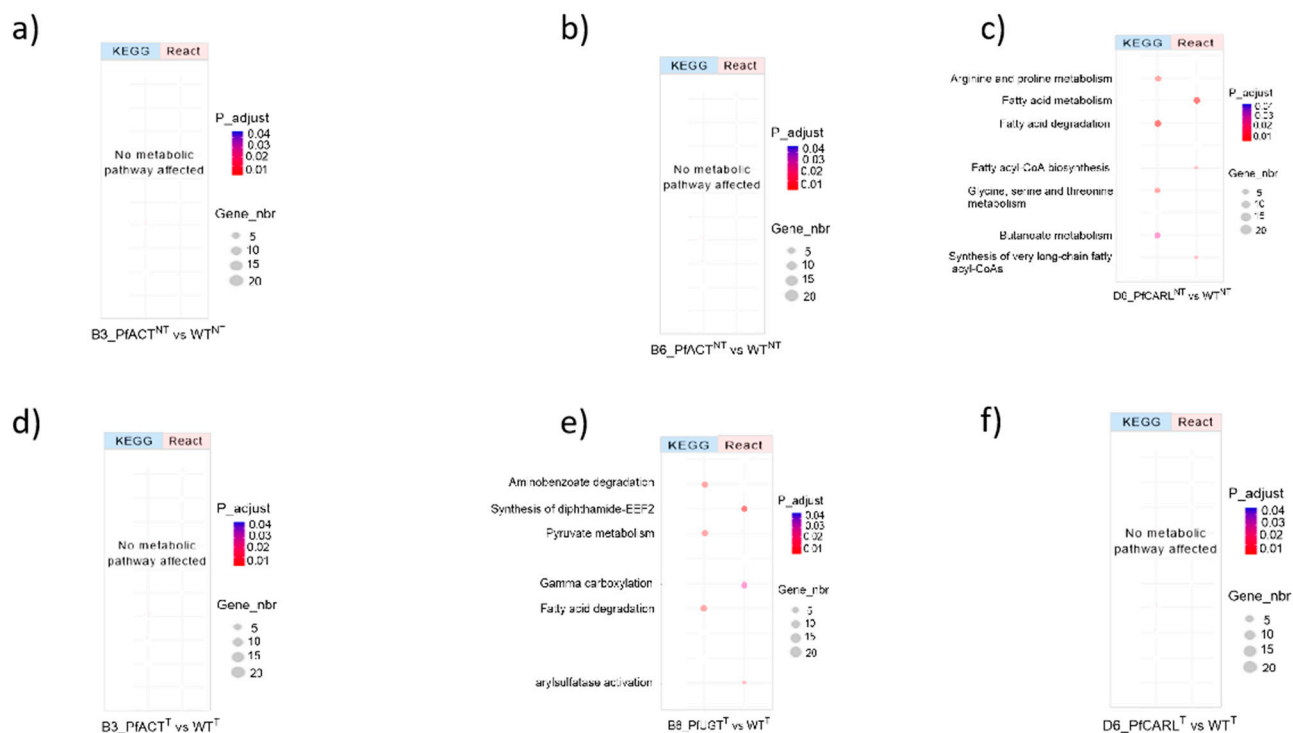

**Figure S6. Key metabolic pathways affected by GNF179 between Wild type and IPZ resistant parasite in GNF179 (100 nM) treated and untreated condition.** **a)** Wild type (WT<sup>NT</sup>) parasites versus mutant (B3\_PfACT<sup>NT</sup>); **b)** Wild type (WT<sup>NT</sup>) parasites versus mutant (B6\_PfUGT<sup>NT</sup>), **c)** Wild type (WT<sup>NT</sup>) parasites versus mutant (D6\_PfCARL<sup>NT</sup>) parasites resistant to IPZ; **d)** Wild type (WT<sup>T</sup>) parasites versus mutant (B3\_PfACT<sup>T</sup>); **e)** Wild type (WT<sup>T</sup>) parasites versus mutant (B6\_PfUGT<sup>T</sup>), **f)** Wild type (WT<sup>T</sup>) parasites versus mutant (D6\_PfCARL<sup>T</sup>) parasites resistant to IPZ.
